# Supplementary material
Source: MDPI journal article supplement (https://www.mdpi.com/2075-4701/13/4/681)
Supplement: s1 [file s1]

„Investigation of the Porosity Gradient in Thickness Direction Formed by Cold Rolling in Porous Aluminum”

Jörn Tyachsen\* and Joachim Rösler

Institute for Materials Science, TU Braunschweig, Langer Kamp 8, 38106 Braunschweig, Germany

\*Correspondence: j.tyachsen@tu-braunschweig.de Tel.: +49531 391 3067

## Supplementary

Within the supplementary material, measured porosity values for rolling experiments which are not shown within the publication, are shown.

| First Series | Sample designation | Second Series | Sample designation |
|--------------|--------------------|---------------|--------------------|
| Figure S1:   | 5-0.05-1           | Figure S11:   | 5-0.05-1           |
| Figure S2:   | 5-0.05-3           | Figure S12:   | 5-0.05-3           |
| Figure S3:   | 5-0.05-10          | Figure S13:   | 5-0.05-10          |
| Figure S4:   | 5-0.15-1           | Figure S14:   | 5-0.15-1           |
| Figure S5:   | 5-0.15-3           | Figure S15:   | 5-0.15-3           |
| Figure S6:   | 5-0.50-10          | Figure S16:   | 5-0.50-10          |
| Figure S7:   | 20-0.05-3          | Figure S17:   | 20-0.05-3          |
| Figure S8:   | 20-0.15-1          | Figure S18:   | 20-0.15-1          |
| Figure S9:   | 20-0.15-3          | Figure S19:   | 20-0.15-3          |
| Figure S10:  | 20-0.15-10         | Figure S20:   | 20-0.15-10         |

### First series

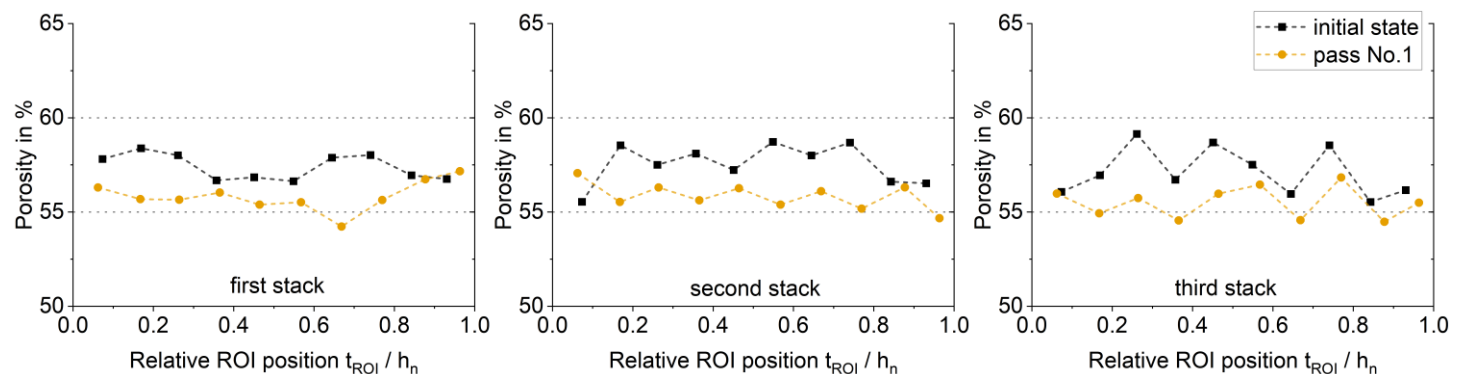

**Figure S1.** Series I: 5-0.05-1 ( $l_d/h_m \approx 1.05$ ): Porosity change over relative sample depth (0 = upper surface; 0.5 = mid-section of sample; 1 = lower surface) due to rolling for first, second and third stack.

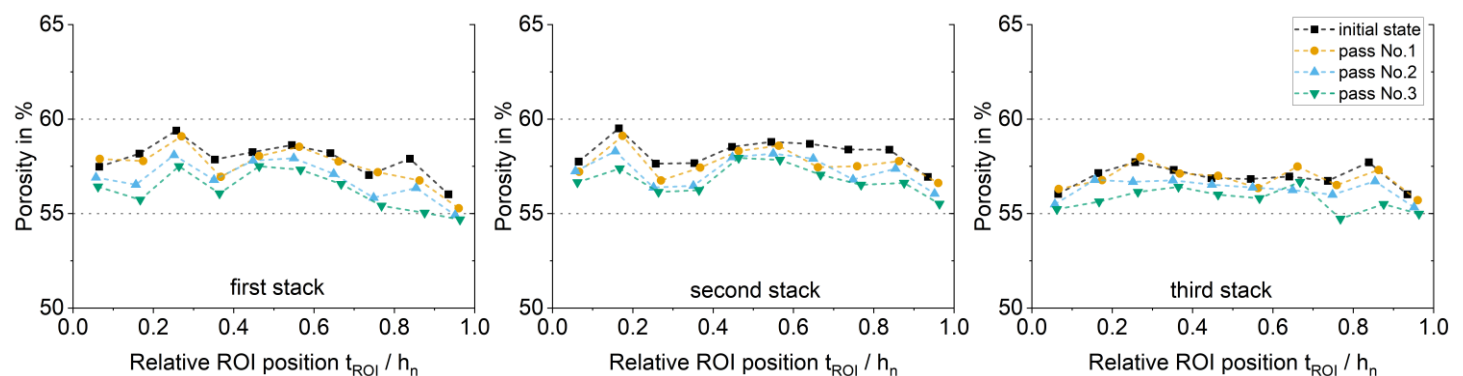

**Figure S2.** Series I: 5-0.05-3 ( $l_d/h_m \approx 0.56-0.62$ ): Porosity change over relative sample depth (0 = upper surface; 0.5 = mid-section of sample; 1 = lower surface) due to rolling for first, second and third stack.

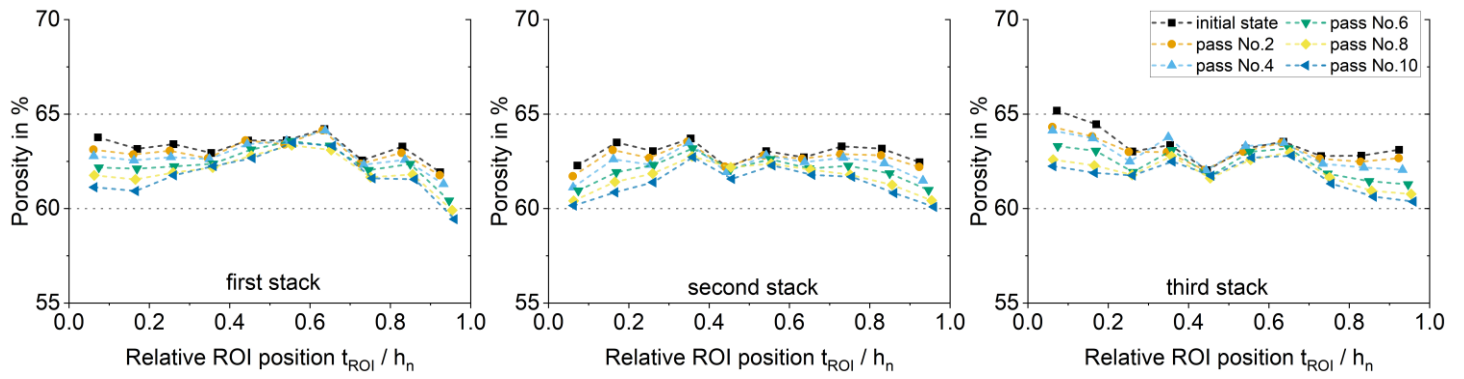

**Figure S3.** Series I: 5-0.05-10 ( $l_d/h_m \approx 0.20-0.41$ ): Porosity change over relative sample depth (0 = upper surface; 0.5 = mid-section of sample; 1 = lower surface) due to rolling for first, second and third stack.

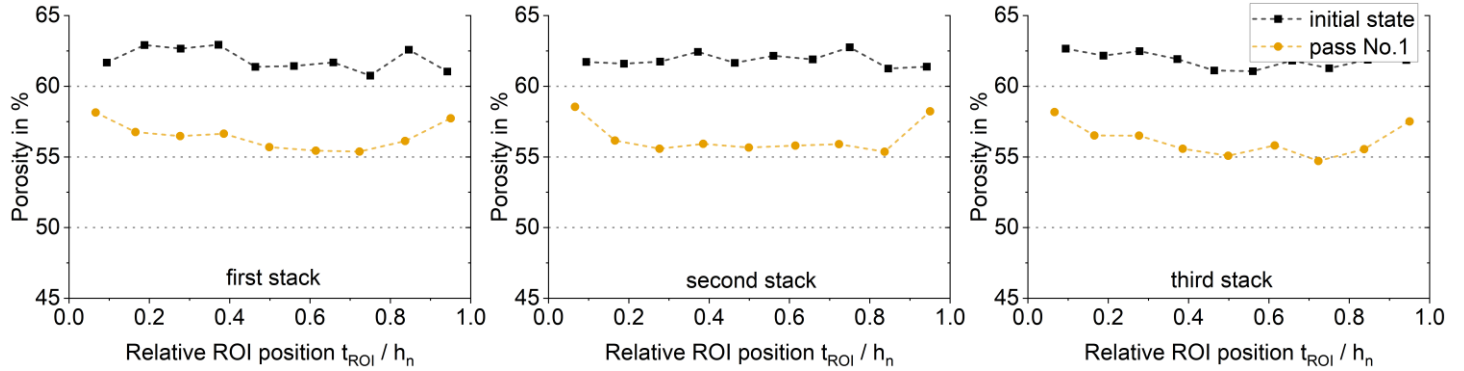

**Figure S4.** Series I: 5-0.15-1 ( $l_d/h_m \approx 1.90$ ): Porosity change over relative sample depth (0 = upper surface; 0.5 = mid-section of sample; 1 = lower surface) due to rolling for first, second and third stack.

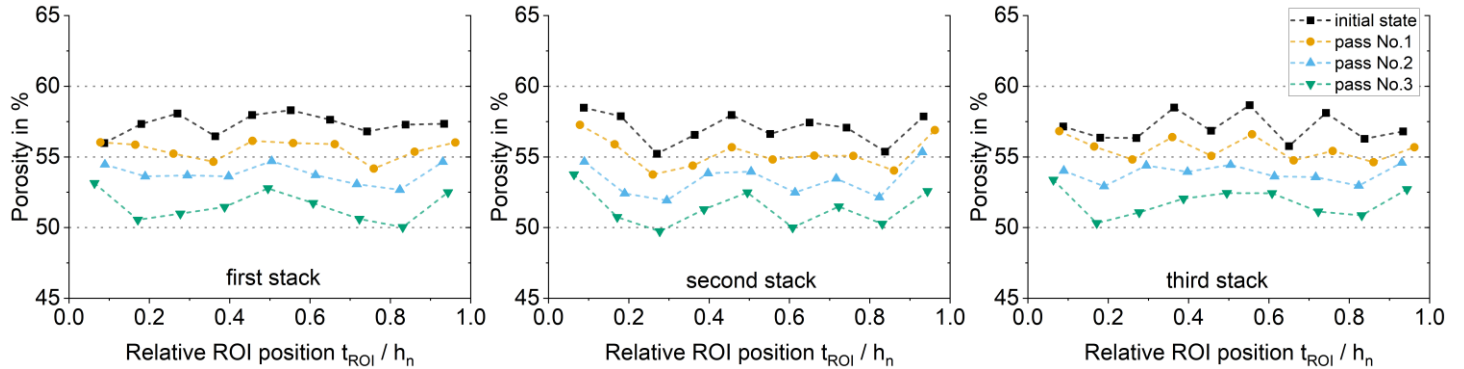

**Figure S5.** Series I: 5-0.15-3 ( $l_d/h_m \approx 1.07-1.09$ ): Porosity change over relative sample depth (0 = upper surface; 0.5 = mid-section of sample; 1 = lower surface) due to rolling for first, second and third stack.

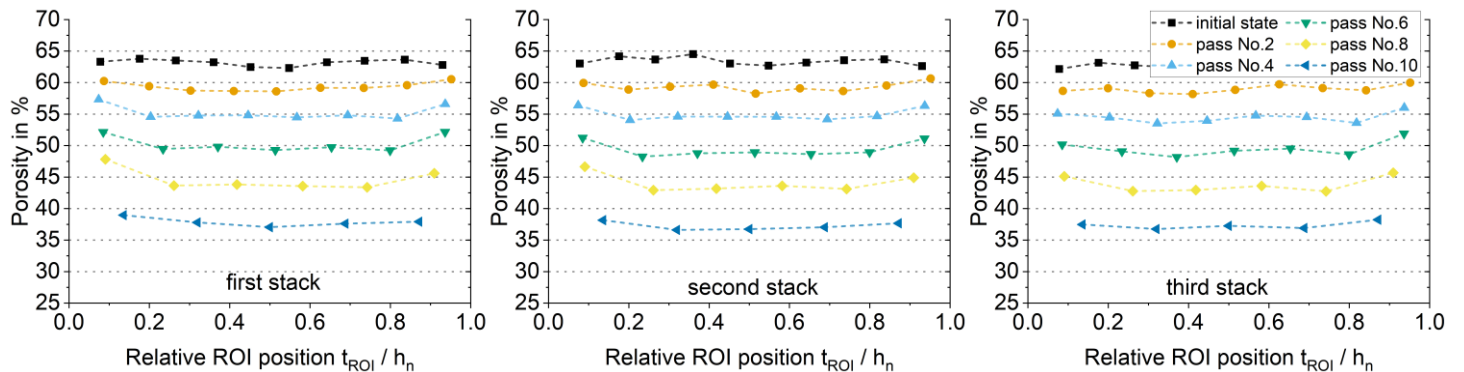

**Figure S6.** Series I: 5-0.50-10 ( $l_d/h_m \approx 1.19-1.64$ ): Porosity change over relative sample depth (0 = upper surface; 0.5 = mid-section of sample; 1 = lower surface) due to rolling for first, second and third stack.

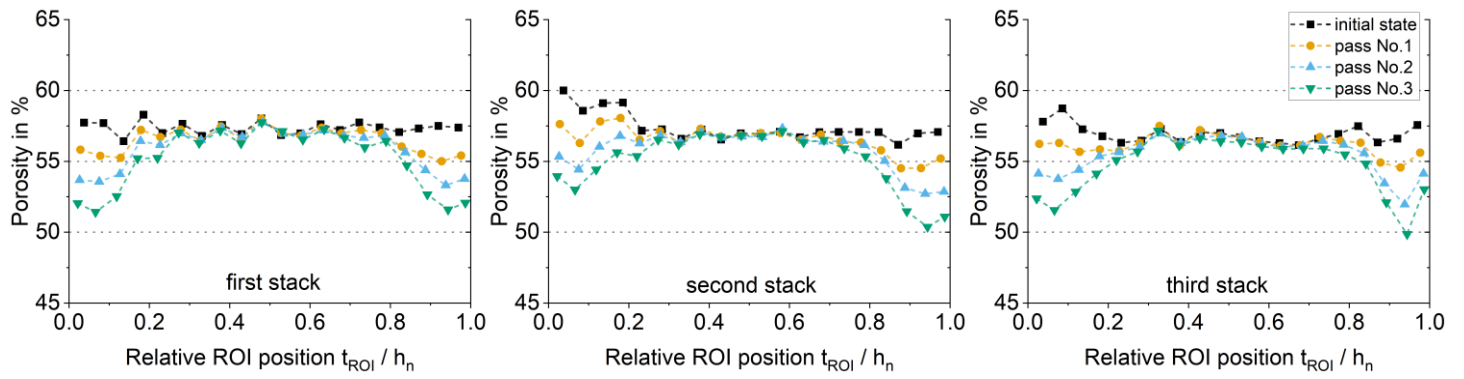

**Figure S7.** Series I: 20-0.05-3 ( $l_d/h_m \approx 0.28-0.30$ ): Porosity change over relative sample depth (0 = upper surface; 0.5 = mid-section of sample; 1 = lower surface) due to rolling for first, second and third stack.

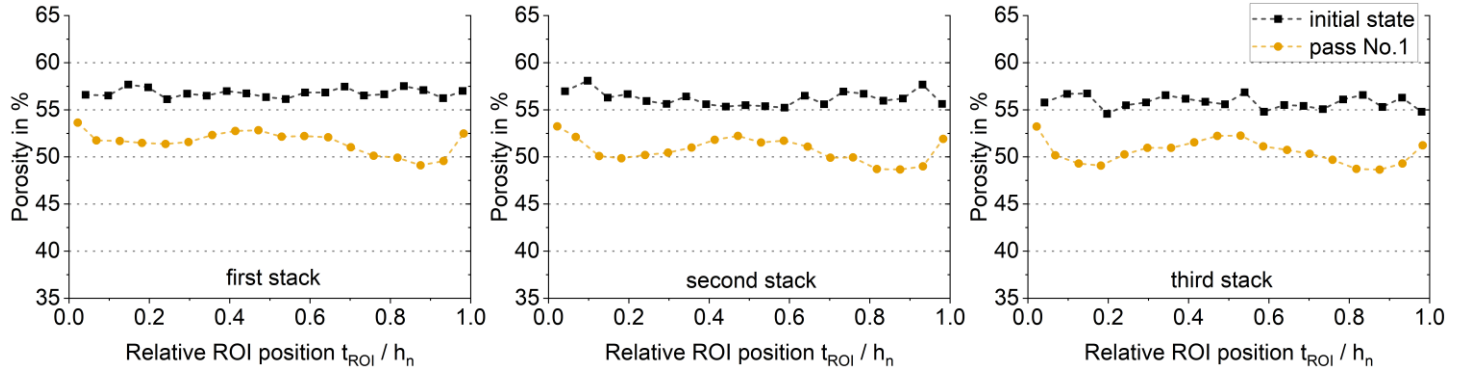

**Figure S8.** Series I: 20-0.15-1 ( $l_d/h_m \approx 0.92$ ): Porosity change over relative sample depth (0 = upper surface; 0.5 = mid-section of sample; 1 = lower surface) due to rolling for first, second and third stack.

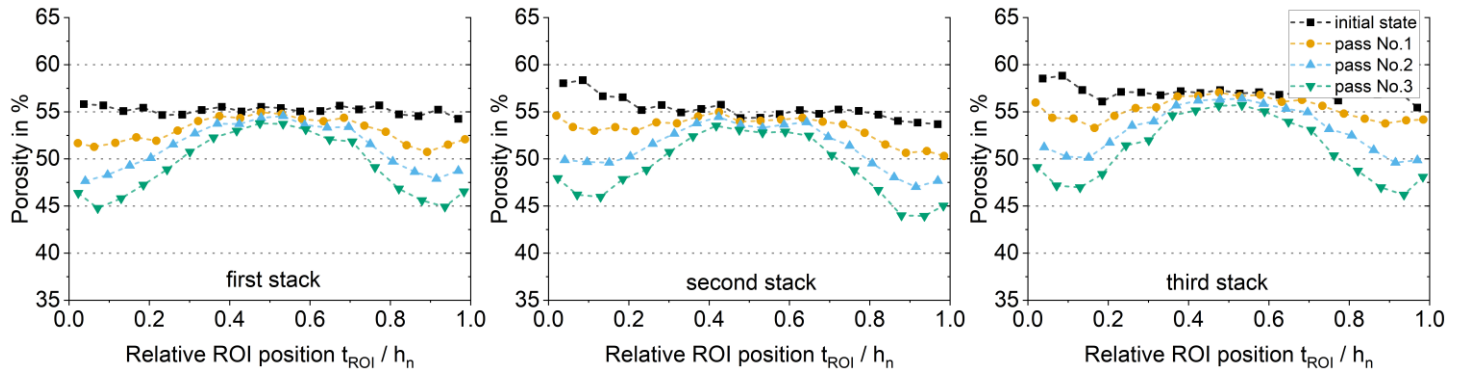

**Figure S9.** Series I: 20-0.15-3 ( $l_d/h_m \approx 0.53-0.55$ ): Porosity change over relative sample depth (0 = upper surface; 0.5 = mid-section of sample; 1 = lower surface) due to rolling for first, second and third stack.

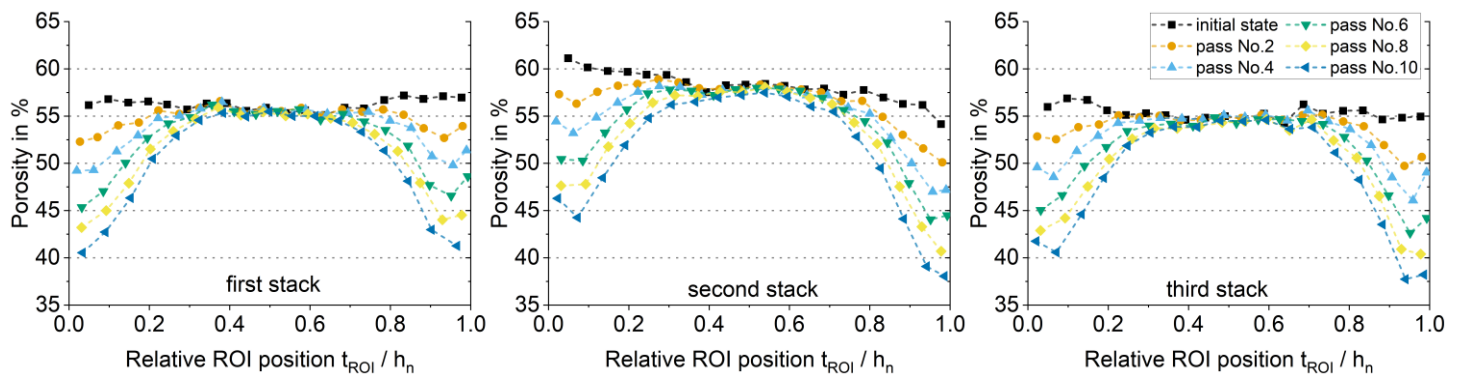

**Figure S10.** Series I: 20-0.15-10 ( $l_d/h_m \approx 0.28-0.31$ ): Porosity change over relative sample depth (0 = upper surface; 0.5 = mid-section of sample; 1 = lower surface) due to rolling for first, second and third stack.

## Second series

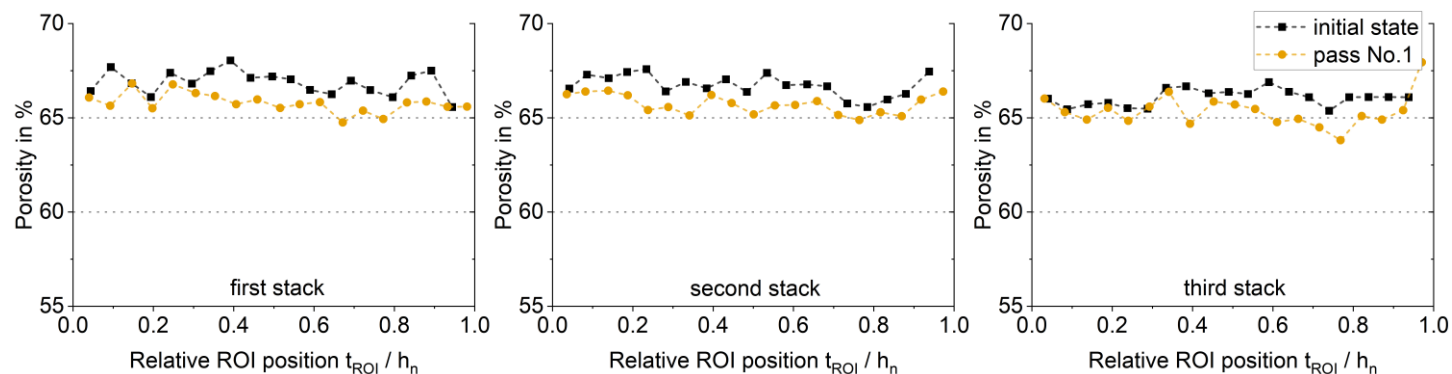

**Figure S11.** Series II: 5-0.05-1 ( $l_d/h_m \approx 1.03$ ): Porosity change over relative sample depth (0 = upper surface; 0.5 = mid-section of sample; 1 = lower surface) due to rolling for first, second and third stack.

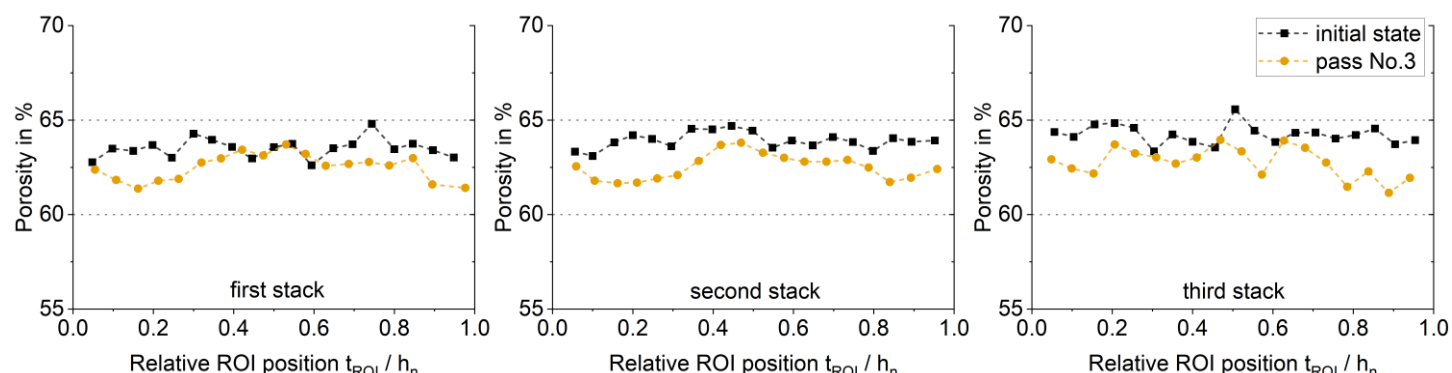

**Figure S12.** Series II: 5-0.05-3 ( $l_d/h_m \approx 0.57-0.62$ ): Porosity change over relative sample depth (0 = upper surface; 0.5 = mid-section of sample; 1 = lower surface) due to rolling for first, second and third stack.

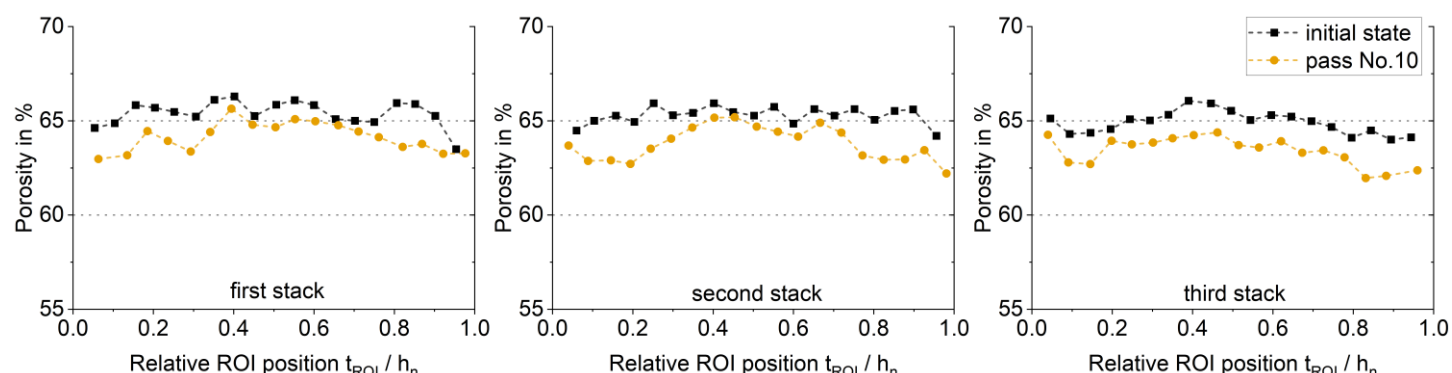

**Figure S13.** Series II: 5-0.05-10 ( $l_d/h_m \approx 0.20-0.45$ ): Porosity change over relative sample depth (0 = upper surface; 0.5 = mid-section of sample; 1 = lower surface) due to rolling for first, second and third stack.

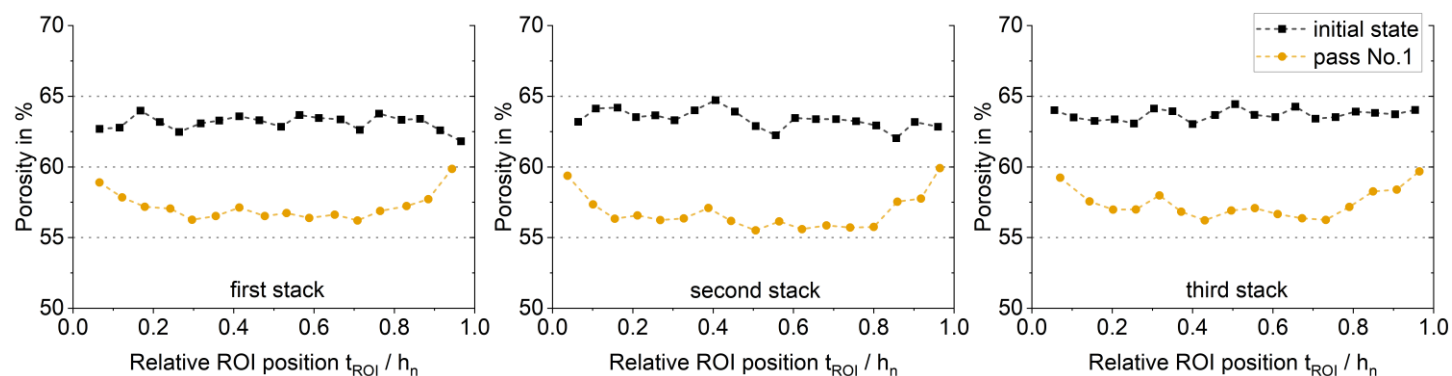

**Figure S14.** Series II: 5-0.15-1 ( $l_d/h_m \approx 1.87$ ): Porosity change over relative sample depth (0 = upper surface; 0.5 = mid-section of sample; 1 = lower surface) due to rolling for first, second and third stack.

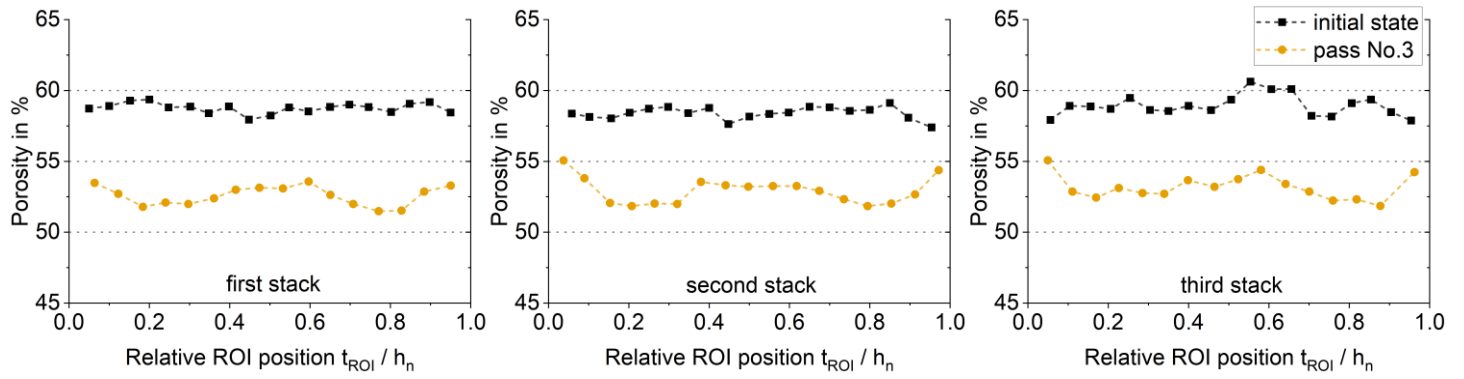

**Figure S15.** Series II: 5-0.15-3 ( $l_d/h_m \approx 1.04$ -1.15): Porosity change over relative sample depth (0 = upper surface; 0.5 = mid-section of sample; 1 = lower surface) due to rolling for first, second and third stack.

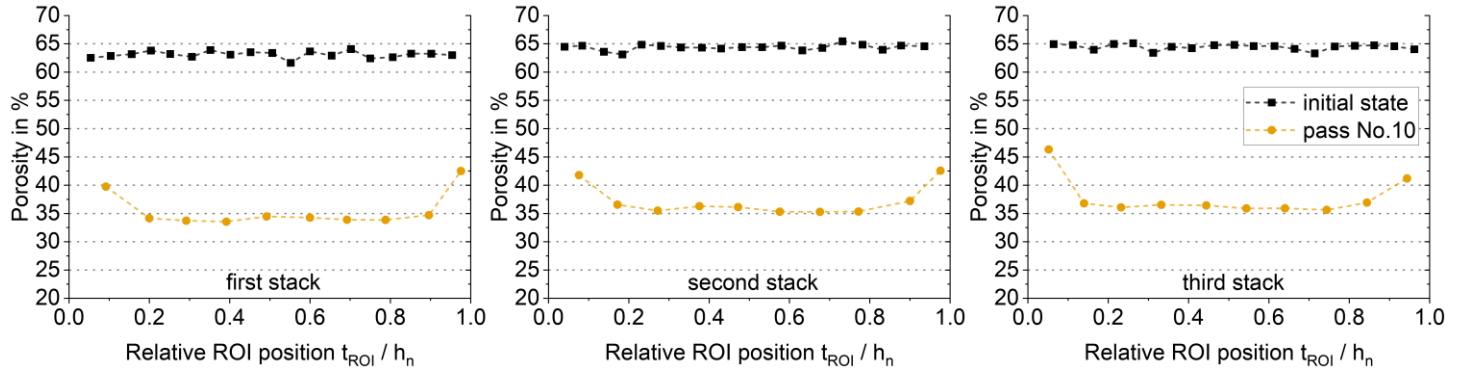

**Figure S16.** Series II: 5-0.50-10 ( $l_d/h_m \approx 1.17$ -1.64): Porosity change over relative sample depth (0 = upper surface; 0.5 = mid-section of sample; 1 = lower surface) due to rolling for first, second and third stack.

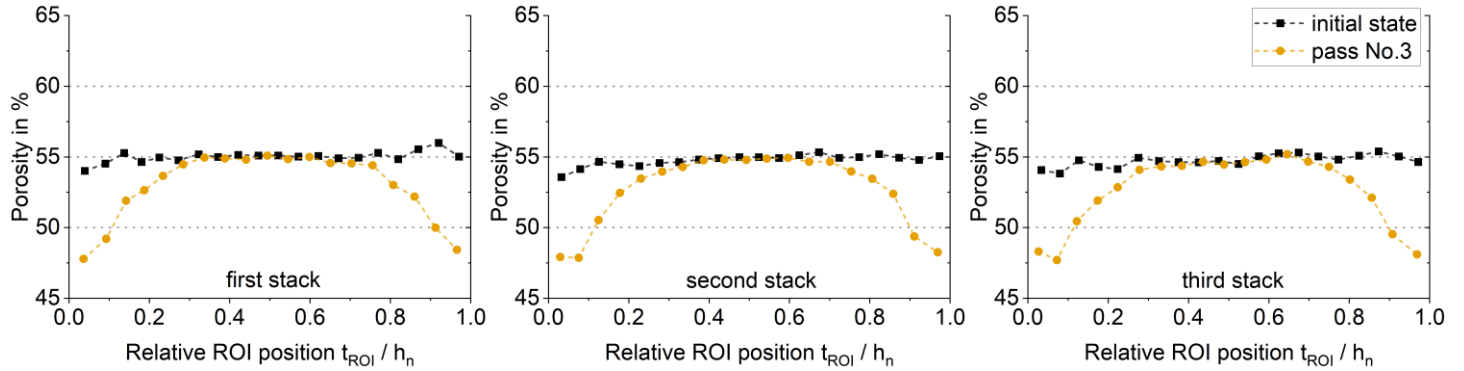

**Figure S17.** Series II: 20-0.05-3 ( $l_d/h_m \approx 0.25$ -0.33): Porosity change over relative sample depth (0 = upper surface; 0.5 = mid-section of sample; 1 = lower surface) due to rolling for first, second and third stack.

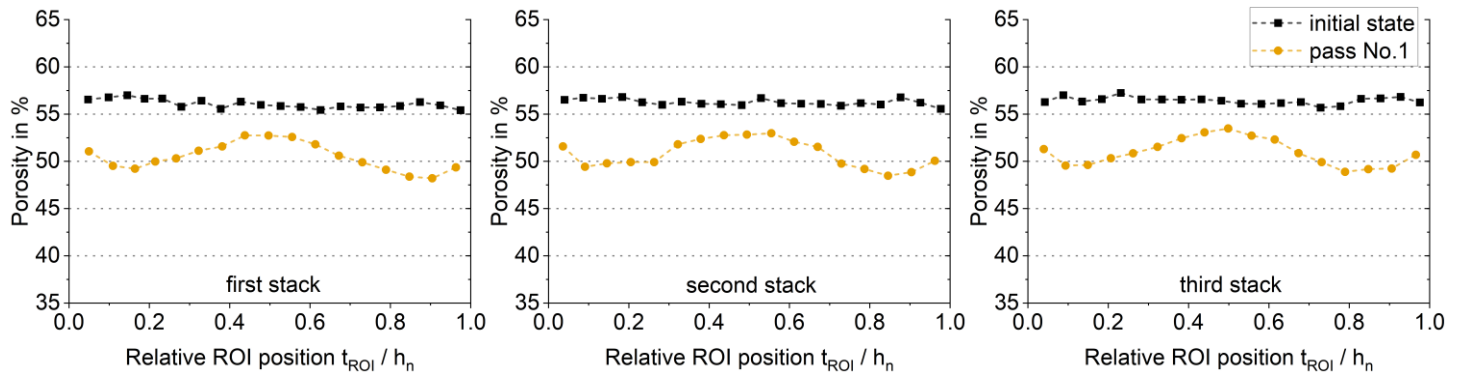

**Figure S18.** Series II: 20-0.15-1 ( $l_d/h_m \approx 0.93$ ): Porosity change over relative sample depth (0 = upper surface; 0.5 = mid-section of sample; 1 = lower surface) due to rolling for first, second and third stack.



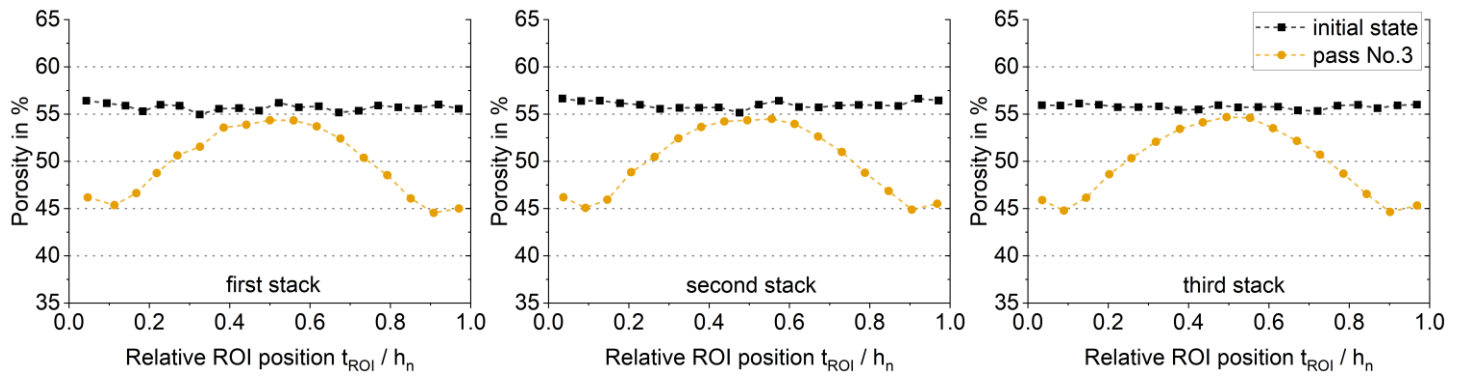

**Figure S19.** Series II: 20-0.15-3 ( $l_d/h_m \approx 0.52-0.55$ ): Porosity change over relative sample depth (0 = upper surface; 0.5 = mid-section of sample; 1 = lower surface) due to rolling for first, second and third stack.

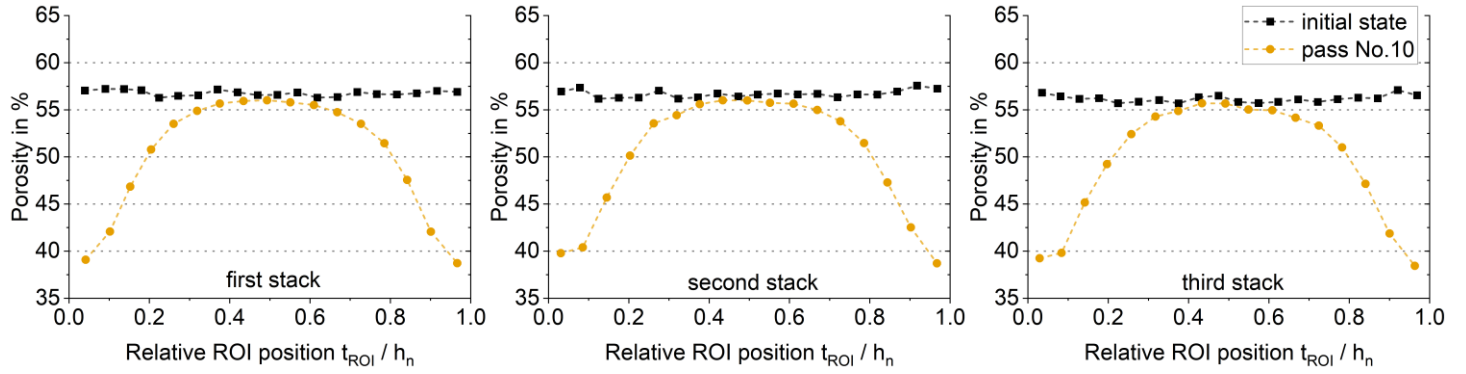

**Figure S20.** Series II: 20-0.15-10 ( $l_d/h_m \approx 0.28-0.31$ ): Porosity change over relative sample depth (0 = upper surface; 0.5 = mid-section of sample; 1 = lower surface) due to rolling for first, second and third stack.
